# Supplementary material for: Frizzled-related proteins 4 (SFRP4) rs1802073G allele predicts the elevated serum lipid levels during acitretin treatment in psoriatic patients from Hunan, China
Source: PeerJ. 2018 Apr 13;6:e4637. doi: 10.7717/peerj.4637 (PMC5900929; doi:10.7717/peerj.4637)
Supplement: Data S1 [file peerj-06-4637-s003.xlsx]

## Sheet: Sheet1
Serial number	Gender	Age(y)	BMI	SFRP4 rs1802073	Pre-therapy				Post-therapy
					TG(mmol/l)	TC(mmol/l)	HDL-C(mmol/l)	LDL-C(mmol/l)	TG(mmol/l)	TC(mmol/l)	HDL-C(mmol/l)	LDL-C(mmol/l)
1	Male	60	20.76	TT	0.95	2.91	1.52	1.11	0.71	3.61	1.9	1.21
2	Female	40	32.05	GG	2.12	5.13	1.99	2.62	2.19	5.48	1.76	2.85
3	Male	31	20.76	GT	1.39	3.54	1	2.06	2.78	4.22	1.01	2.53
4	Female	49	20.28	GT	1.65	4.76	1.62	2.3	1.94	5.8	1.62	3.37
5	Male	40	20.7	GT	0.82	5.35	1.53	3.01	0.9	4.4	1.34	2.39
6	Female	59	19.49	GT	1.21	5.12	1.79	2.36	1.64	5.68	1.29	3.03
7	Female	44	22	GT	1.4	5.04	1.15	2.65	3.1	4.95	0.9	3.14
8	Male	24	17.84	TT	1.15	5.18	1.55	2.64	0.77	4.62	1.23	2.65
9	Male	45	16.65	GG	1.94	6.19	1.24	3.75	1.72	7.34	1.61	4.53
10	Male	45	24.98	TT	1.39	5.4	1.2	3.82	1.06	5.17	1.23	3.04
11	Male	34	24.72	GT	0.74	4.92	1.66	2.1	0.75	5.28	1.58	3.51
12	Male	31	24.1	GT	0.47	3.1	1.53	0.92	0.55	2.68	1.43	1
13	Male	72	24	TT	1.56	5.77	1.44	3.94	0.8	5.98	1.52	3.34
14	Male	33	22.38	GG	1.32	4.78	1.16	2.89	1.7	4.63	1.19	2.76
15	Female	48	22.04	TT	4.05	4.52	1.16	3.08	3.14	4.21	0.94	2.67
16	Male	44	22.03	GT	1.41	5.24	1.62	2.84	2.97	5.83	1.36	3.59
17	Male	38	21.26	GT	1.12	6.84	2.21	3.28	0.69	6.34	2.23	3.73
18	Female	27	18.36	TT	0.82	4.19	1.6	1.94	0.67	4.78	1.8	2.6
19	Female	41	23.04	GG	0.69	4.62	2.64	1.25	0.56	4.24	2.24	1.64
20	Male	39	20.76	GT	1.03	5.15	1.21	3.47	1.06	4.98	1.28	3.56
21	Male	47	24	GT	1.86	5.55	1.33	3.86	2.89	5.25	1.27	3.63
22	Female	52	20.95	TT	1.89	6.83	1.33	4.54	1.93	5.61	1.32	3.53
23	Female	36	18.22	GG	0.54	5.81	2.14	2.92	0.61	5.84	1.67	3.45
24	Male	19	18.36	GT	0.74	4.57	1.34	2.53	0.52	4.06	1.35	2.23
25	Male	21	19.59	GT	1.27	4.05	1.13	2.25	1.06	3.79	1.26	2.05
26	Male	40	24.22	GT	1.43	4.94	1.99	2.44	1.35	5.21	1.23	3.34
27	Male	24	19.59	GT	0.99	2.55	1.46	1.57	0.75	3.14	1.23	1.66
28	Male	42	25.99	GT	1.77	4.7	1.01	3.13	2.35	4.66	0.88	3.13
29	Male	50	33.65	GT	0.73	3.43	1.47	1.62	2.38	5.77	1.42	3.55
30	Male	58	20.57	GT	1.07	4.94	1.38	2.68	0.78	3.96	1.27	2.13
31	Female	21	22.21	GT	0.57	4.43	1.43	2.5	0.6	3.98	1.35	1.89
32	Male	45	23.43	GT	1.98	7.15	1.12	4.88	1.56	6.82	1.37	4.28
33	Male	32	17.3	TT	1.3	5.52	1.68	3.07	1.16	5.09	1.47	2.95
34	Male	25	19.36	TT	1.08	3.52	1.34	1.57	1.17	3.14	1.13	1.43
35	Male	24	17.78	GT	0.99	4.91	1.51	2.81	1.47	5.59	1.49	3.52
36	Male	37	19.62	GG	1.23	4.23	1.31	2.61	0.85	3.63	1	2.28
37	Male	40	28.06	GT	1.46	4.44	1.5	2.43	2.4	4.7	1.25	2.79
38	Male	42	26.98	GT	1.1	3.62	1.35	2.01	2.1	5.22	1.81	2.92
39	Male	51	20.77	GG	1.03	4.31	1.43	2.31	1.1	4.56	1.31	2.75
40	Male	19	17.1	GT	0.62	3.75	1.82	1.61	0.93	3.94	1.7	1.63
41	Male	37	19.23	TT	1.28	6.55	1.38	4.41	0.84	5.53	1.44	3.17
42	Male	29	19.56	GT	0.98	4.85	1.54	2.76	1.26	4.52	1.44	2.8
43	Female	31	24.6	TT	0.56	3.4	1.55	1.38	0.64	3.37	1.57	1.42
44	Male	39	28.6	GT	0.74	3.56	0.95	2.02	0.9	3.99	1.03	2.43
45	Male	22	21.38	TT	0.89	3.4	1.25	1.65	0.73	3.62	1.34	1.74
46	Male	41	20.28	GT	1.15	4.45	1.23	2.63	3.18	5	1.34	3.03
47	Female	22	18.66	TT	1.5	5.35	1.61	3.07	0.59	4.69	1.52	2.54
48	Male	42	25.71	GT	2.19	5.39	1.55	3.06	0.74	3.82	1.33	2.05
49	Male	37	19.53	GT	0.71	5.59	2.11	2.85	1.07	4.88	1.76	2.64
50	Female	30	19.81	GT	1.1	4.51	1.27	2.46	1.78	5.93	1.38	3.71
51	Male	53	21.5139	GT	2.1	4.97	1.1	3.25	1.7	4.94	1.12	2.97
52	Male	39	22.2063	GT	2.25	5.6	1.06	3.72	2.58	5.5	1.05	3.51
53	Male	30	22.4059	GT	2.63	4.82	1.43	2.66	2.68	4.32	1.23	2.42
54	Male	76	21.847	TT	0.79	5.4	1.59	3.03	0.93	4.86	1.48	2.53
55	Male	31	19.1001	GT	1.77	3.86	1.09	2.1	1.39	2.86	1.08	1.53
56	Male	26	27.1314	GT	0.7	4.06	1.14	2.31	1.11	4.07	1.12	2.49
57	Male	27	26.2336	GT	1.82	4.76	1.31	2.9	1.98	5.22	1.37	2.91
58	Male	28	37.8776	TT	0.75	5.48	1.61	3	1.66	5.16	1.36	2.97
59	Female	21	26.9531	TT	0.98	4.04	1.42	2.15	0.75	4.8	1.37	2.49
60	Male	63	25.0995	GT	2.01	3.66	0.95	2.1	4.55	4.53	0.89	2.49
61	Male	27	24.7676	GT	1.27	5.09	1.58	2.67	0.77	5.04	1.46	2.72
62	Female	30	24.4898	GT	2.04	5.09	1.29	3.39	2.22	4.8	1.24	2.48
63	Male	53	31.2213	GG	1.15	4.33	1.35	2.4	1.37	4.23	1.16	2.4
64	Female	40	24.0346	GT	1.05	4.21	1.54	2.21	1.15	4.46	1.58	2.22
65	Female	42	23.3887	TT	1.38	5.74	1.57	3.29	1.19	5.09	1.24	3.33
66	Female	63	26.6384	GT	1.92	6.29	1.76	3.74	1.77	6.2	1.9	3.2
67	Male	47	21.6441	GT	1.49	4.96	1.05	3.2	1.35	4.97	1.08	3.28
68	Male	50	29.3658	TT	0.8	5.41	1.47	3.12	1.01	6.1	1.56	3.35
69	Male	41	22.4913	GT	0.91	4.44	0.98	2.64	0.64	4.71	1.03	2.7
70	Male	62	21.3039	TT	0.83	4.24	1.06	2.49	1.23	5.47	1.16	3.52
71	Male	57	23.7118	GT	2.82	6.9	1.21	4.33	3.03	5.81	1.05	3.83
72	Female	49	25.6489	TT	3.68	5.7	1.3	3.52	4.83	4.66	0.93	2.65
73	Male	68	29.2101	GG	0.82	4.01	1.14	2.19	1.31	6.1	1.33	3.83
74	Male	36	20.727	GT	1.5	5.43	1.29	3.13	3.96	6.11	1.2	3.73
75	Male	30	28.6851	GT	2.44	5.8	1.42	3.53	1.59	6.31	1.56	4.02
76	Female	34	28.7347	TT	1.69	5.22	1.45	3.05	1.3	5.25	1.14	3.38
77	Female	30	23.0546	GT	0.57	4.51	1.79	1.89	0.84	4.43	1.38	2.3
78	Female	55	19.9219	TT	4.83	6.07	1.14	3.89	5.36	5.84	1.15	3.82
79	Male	22	23.3726	GT	0.76	4.78	1.29	2.49	2	5.08	1.2	3.41
80	Male	35	19.9792	TT	1.35	3.86	1.22	1.98	1.07	4.2	1.26	2.14
81	Male	46	20.2812	TT	1.2	5.36	1.27	3.44	1.34	5.08	1.38	3.22
82	Female	64	20.5151	GG	2.46	4.66	1.3	2.68	3.24	5.29	1.1	3.43
83	Male	49	20.4152	TT	2.63	5.1	1.1	3.12	3.88	5.65	1.14	3.47
84	Male	43	26.9896	GT	1.48	4.66	1.7	2.6	1.1	4.22	1.57	2.46
